# Supplementary material for: Formation of water–chlorophyll clusters in dilute samples of chlorophyll-a in ether at low temperature
Source: Royal Society of Chemistry journal article supplement (doi:10.1039/c3cp53729c), 2013-12-04

# Formation of water-chlorophyll clusters in dilute samples of chlorophyll-a in ether at low temperature

By Jeffrey R. Reimers, Zheng-Li Cai, Rika Kobayashi, Margus Rätsep, Arvi Freiberg, and Elmars Krausz

## Electronic Supporting Information

### S1. Origin of the ligand dependence of the $Q_x$ - $Q_y$ band gap.

The following figure shows the CAM-B3LYP/6-31G\* orbital diagrams for chlorophyll a from ref. 27.

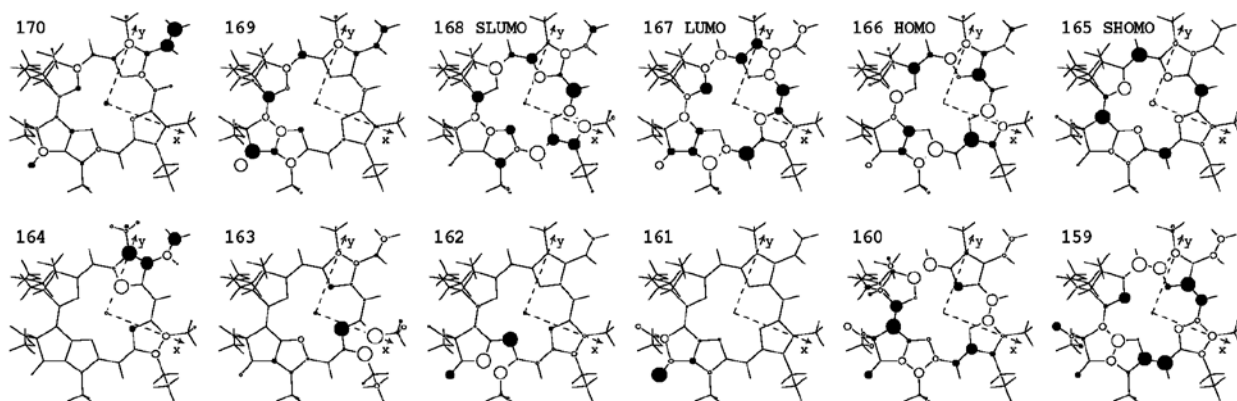

The CAM-B3LYP calculations indicate that the  $Q_y$  transition is composed of wavefunction excitations  $0.24\ 165 \rightarrow 168 + 0.66\ 166 \rightarrow 167$  while  $Q_x$  is composed of  $0.57\ 165 \rightarrow 167 - 0.39\ 166 \rightarrow 168$ . Orbital 165, the second-highest-occupied (SHOMO) molecular orbital is therefore important to the  $Q_x$  transition whilst orbital 166, the HOMO is important for  $Q_y$ . The SHOMO involves a large interaction with the magnesium whilst the HOMO involves very little interaction. Hence ligands which are good Lewis bases destabilize the  $Q_x$  excited state much more than they do  $Q_y$ , leading to a decrease in the  $Q_x$ - $Q_y$  band gap.

### S2. Fitted ABS and MCD spectra for Chl-a in ether with contaminant water.

The following figures, one per page, show using dots the observed MCD (top) and ABS (bottom) spectra and their fit to sums of spectral components: black- total fit, colours- each individual component. The pages are, in order, for Fig. 1a-k. The spectra of the 5CO and 6CO mixture components are shown.

Fig. 1a: CHI-a wet ether 186 K

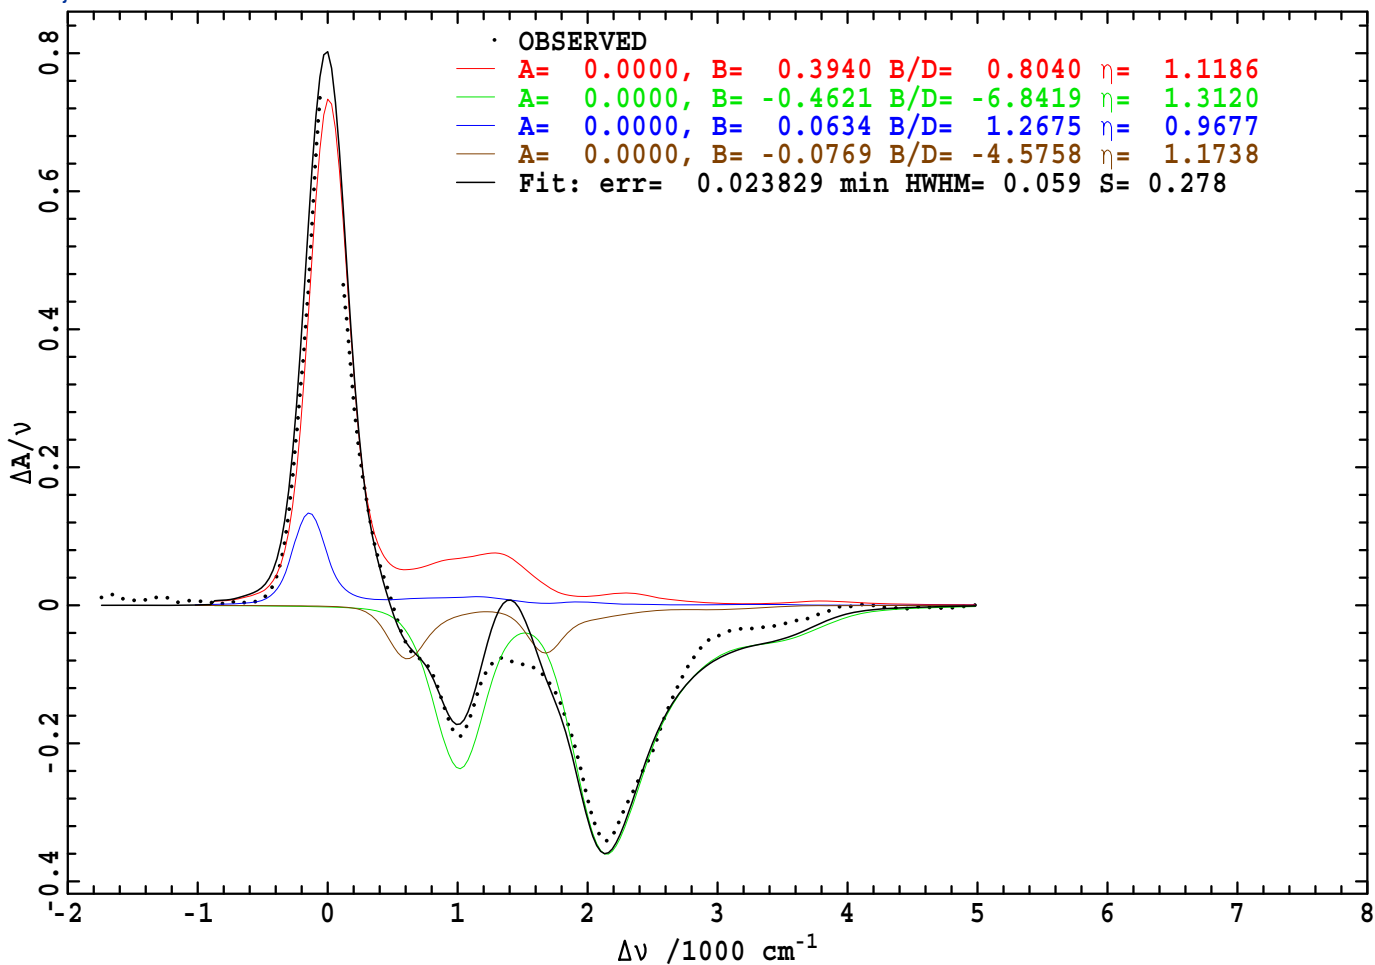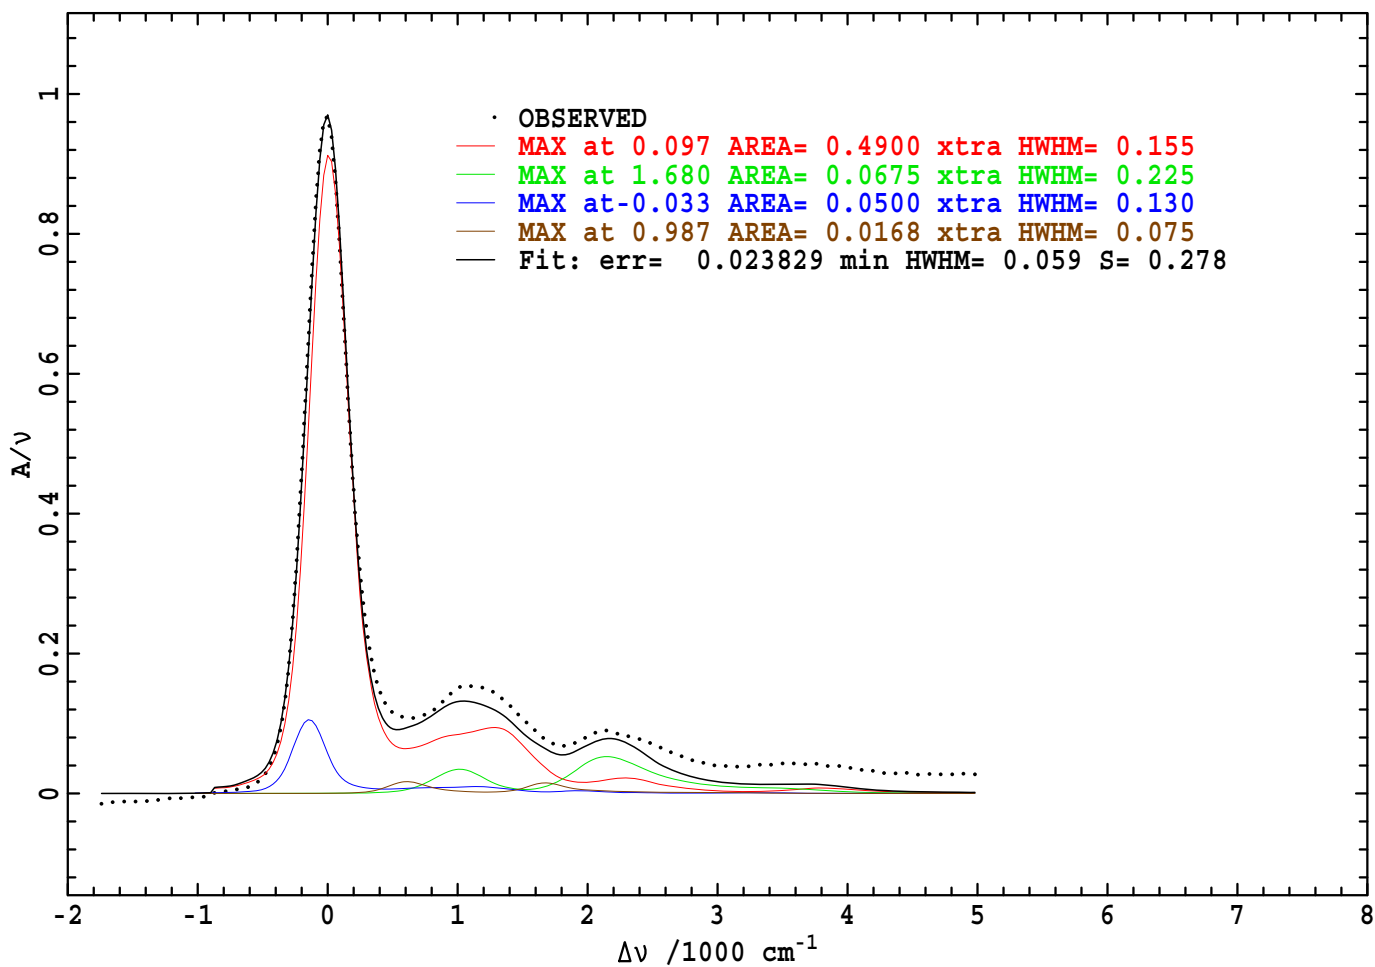

Fig. 1b: CHI-a wet ether 168 K

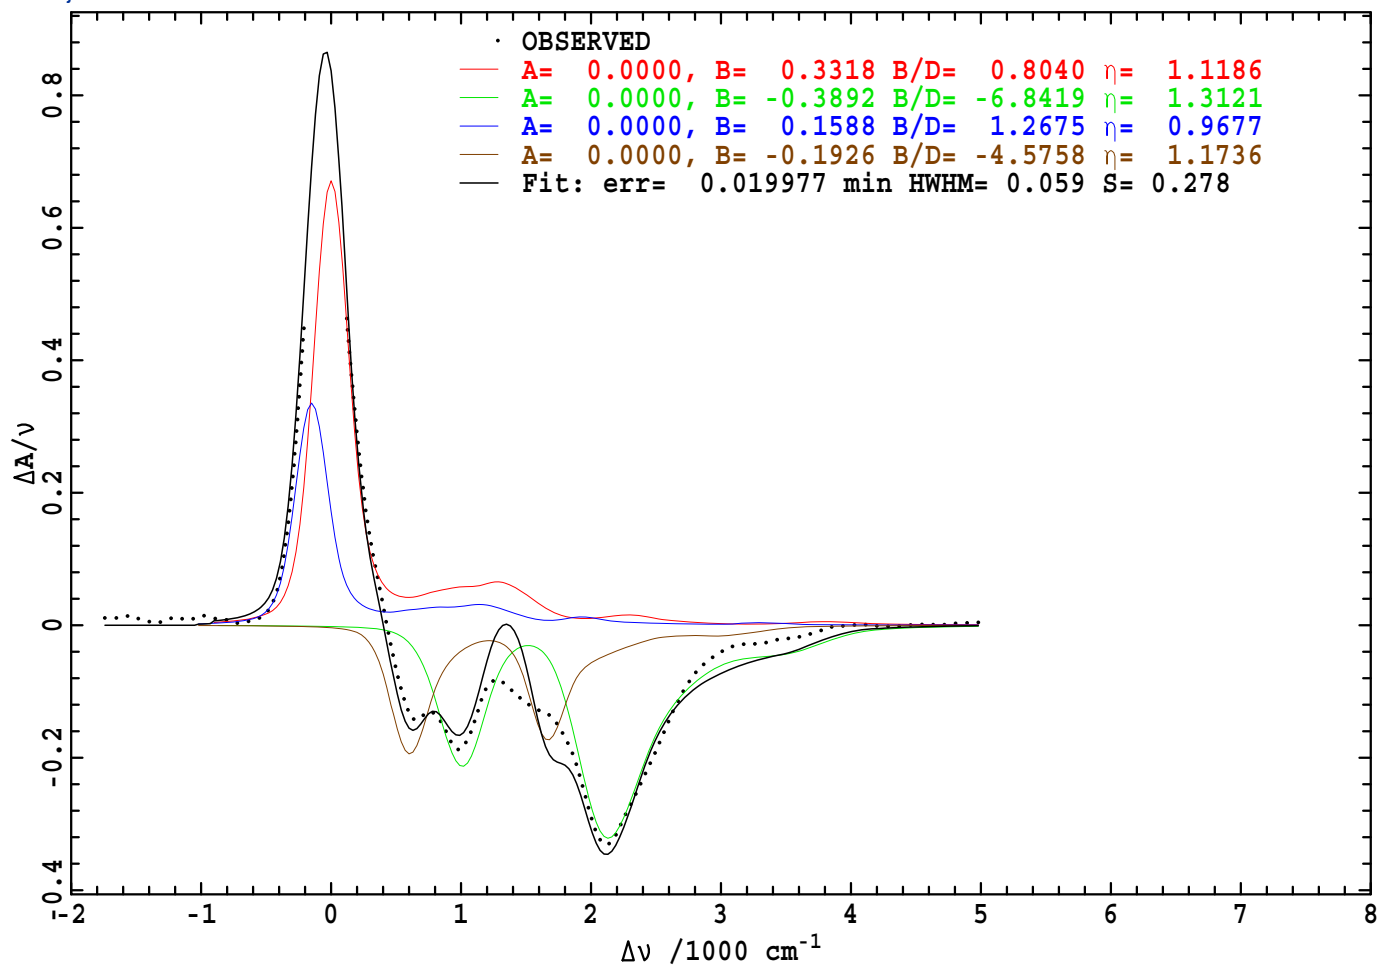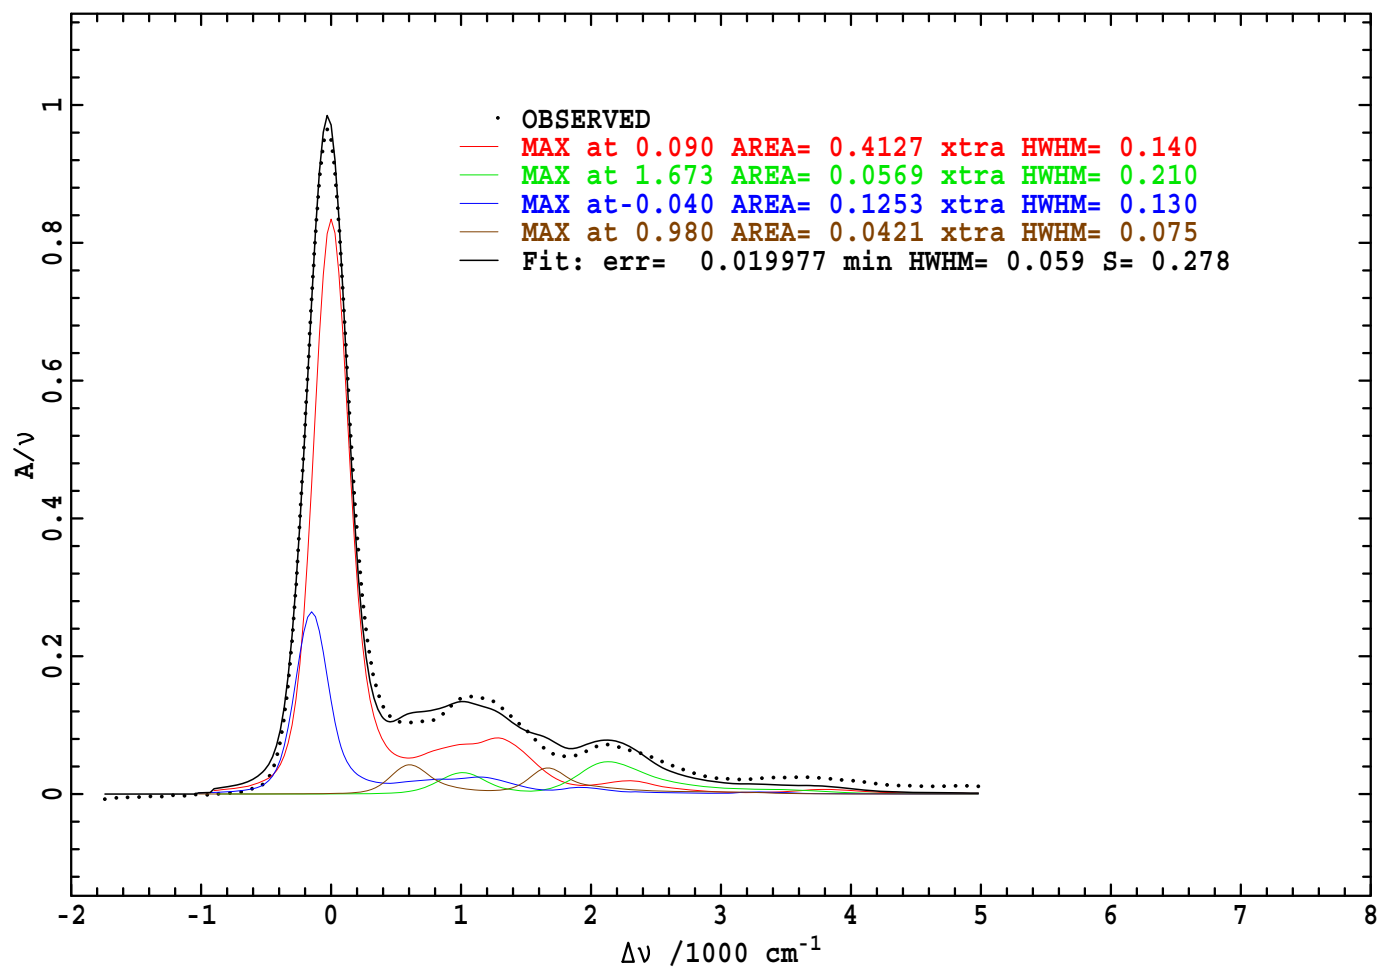

Fig. 1c: CH<sub>2</sub>a wet ether 163 K

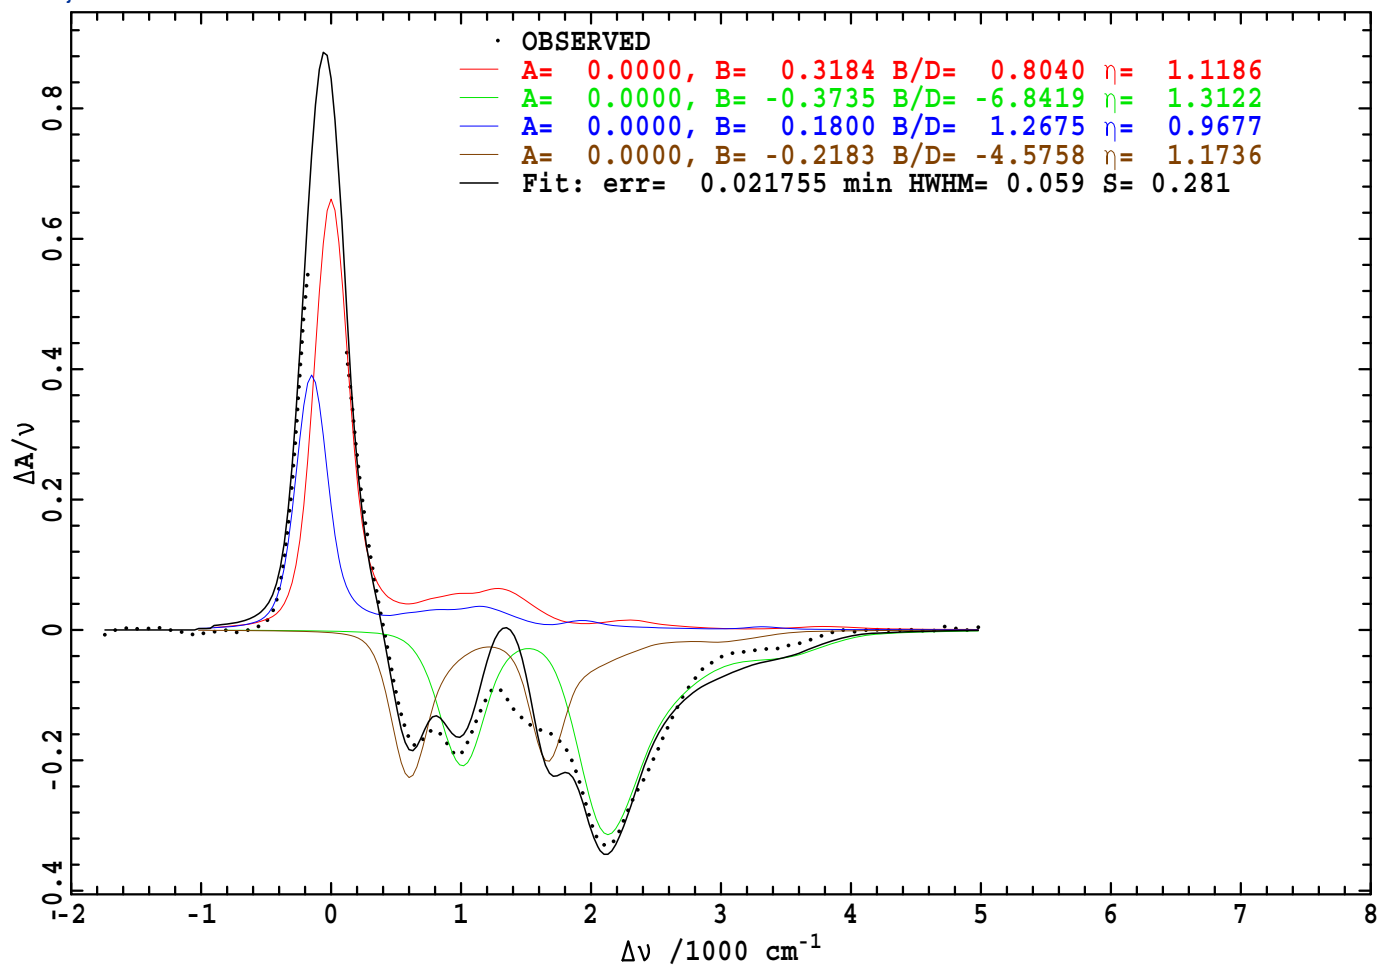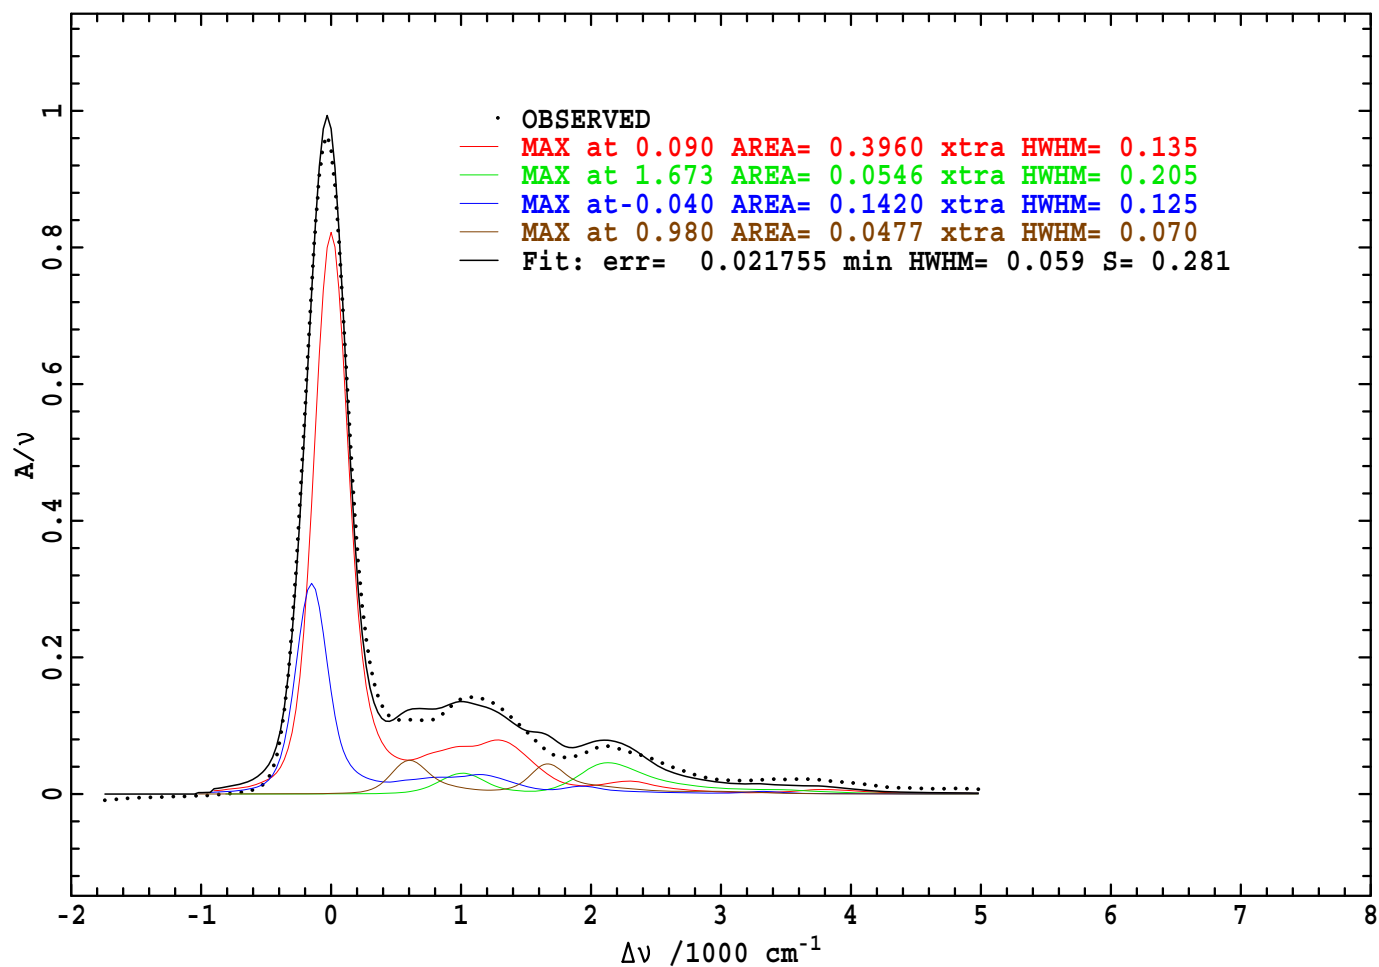

Fig. Id: CHI-a wet ether 156 K

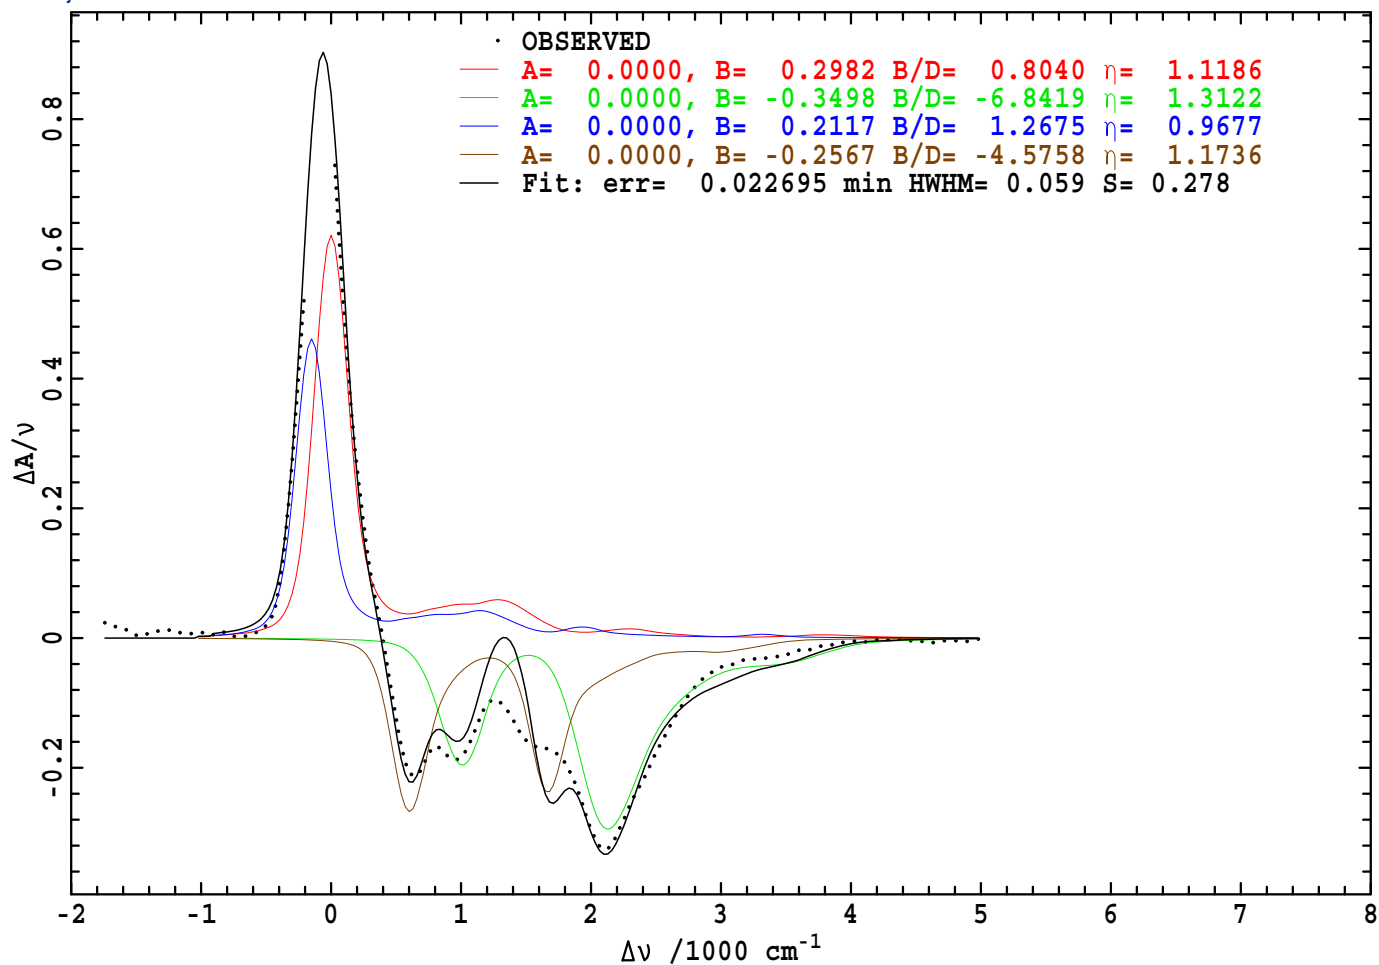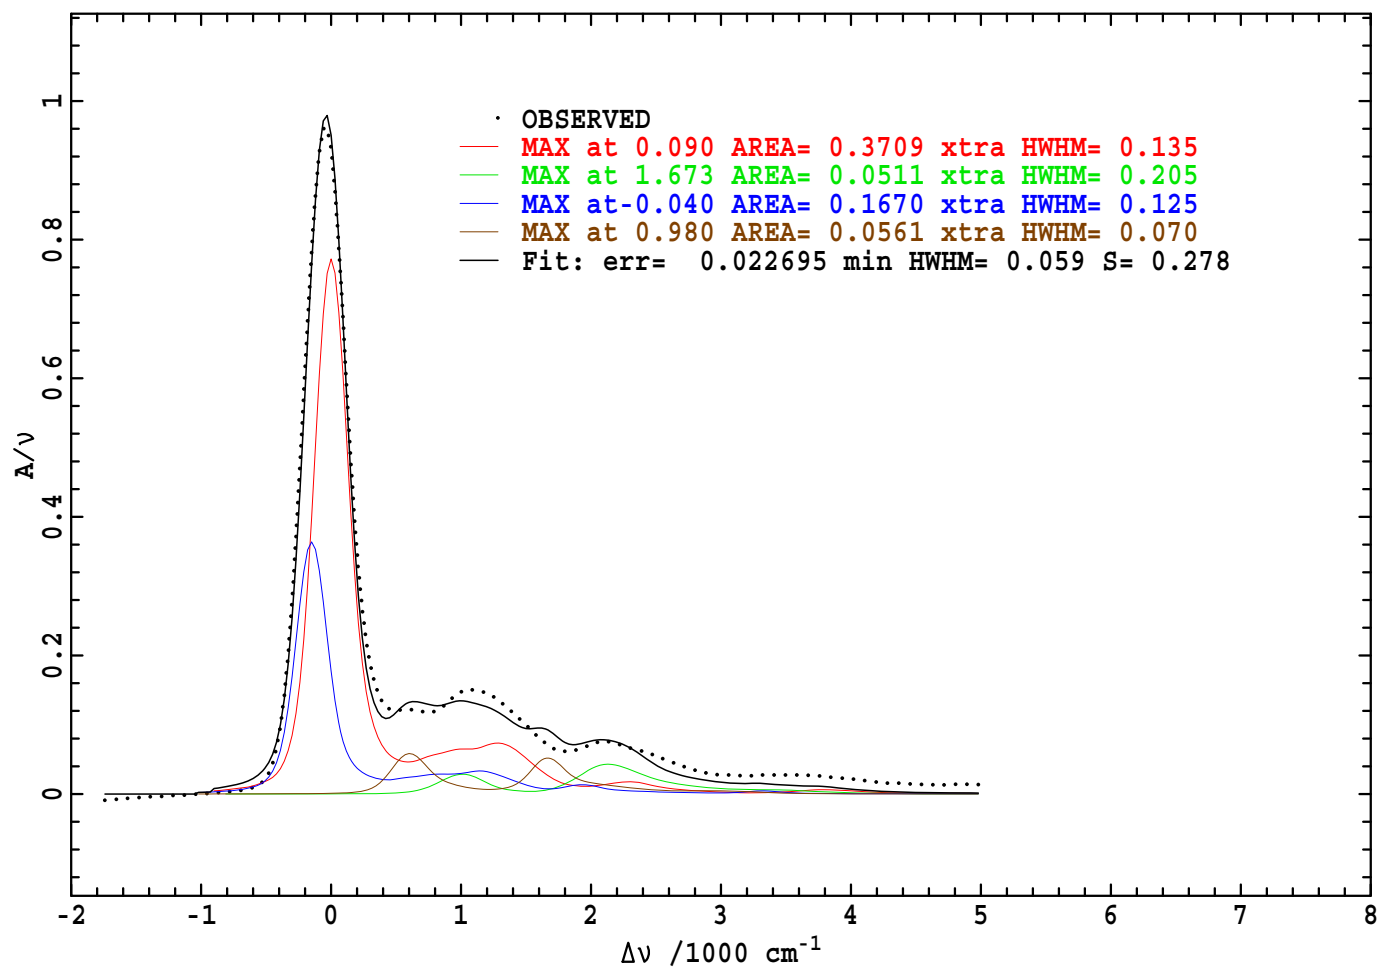

Fig. 1e: Chl-a ether 295 K

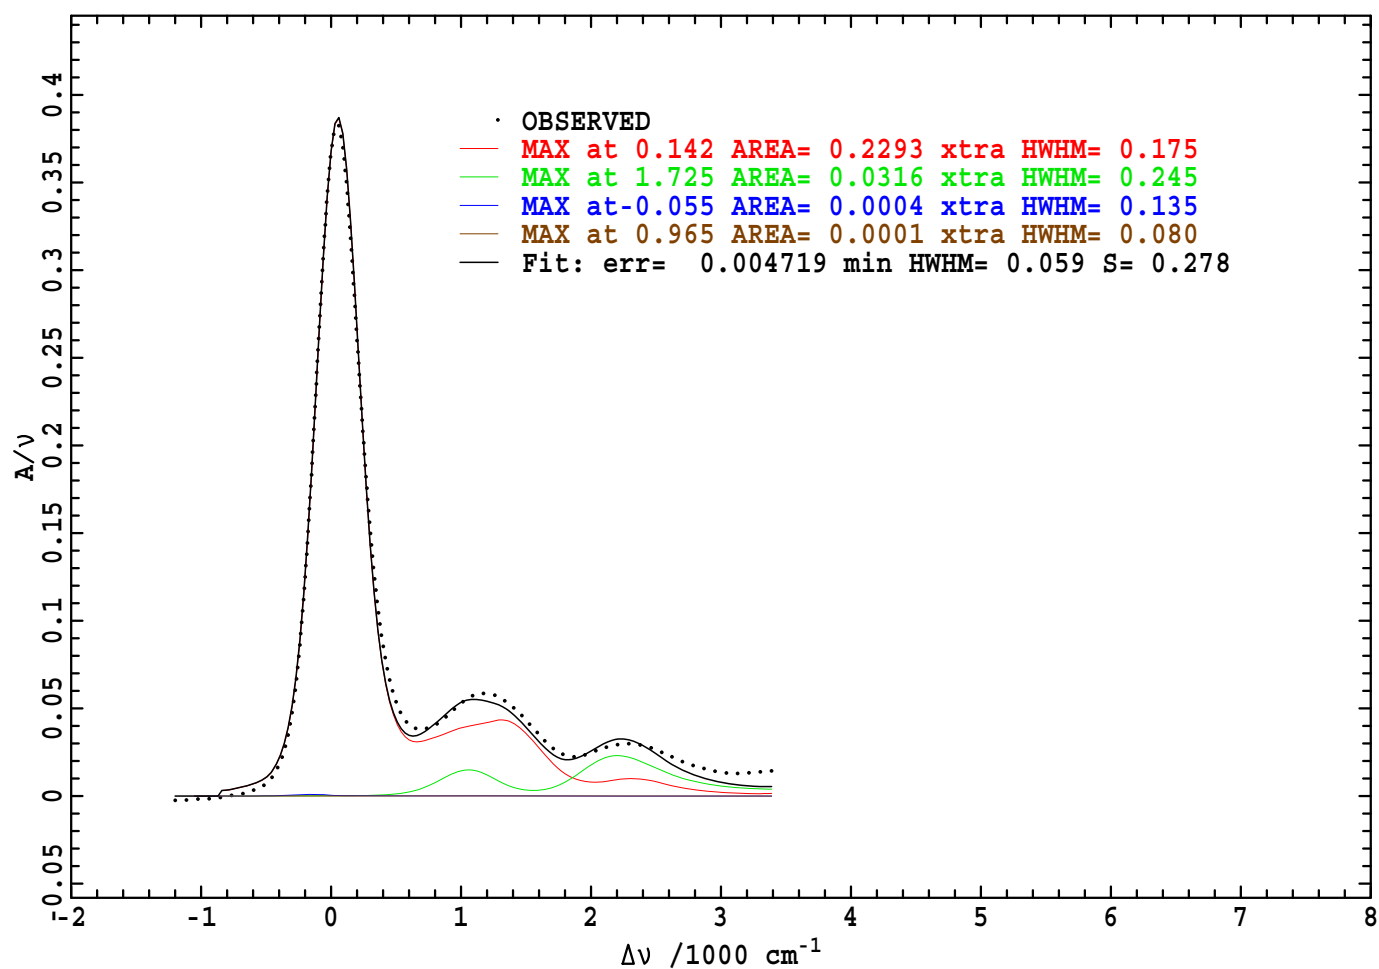

Fig. 1f: Chl-a ether 180 K

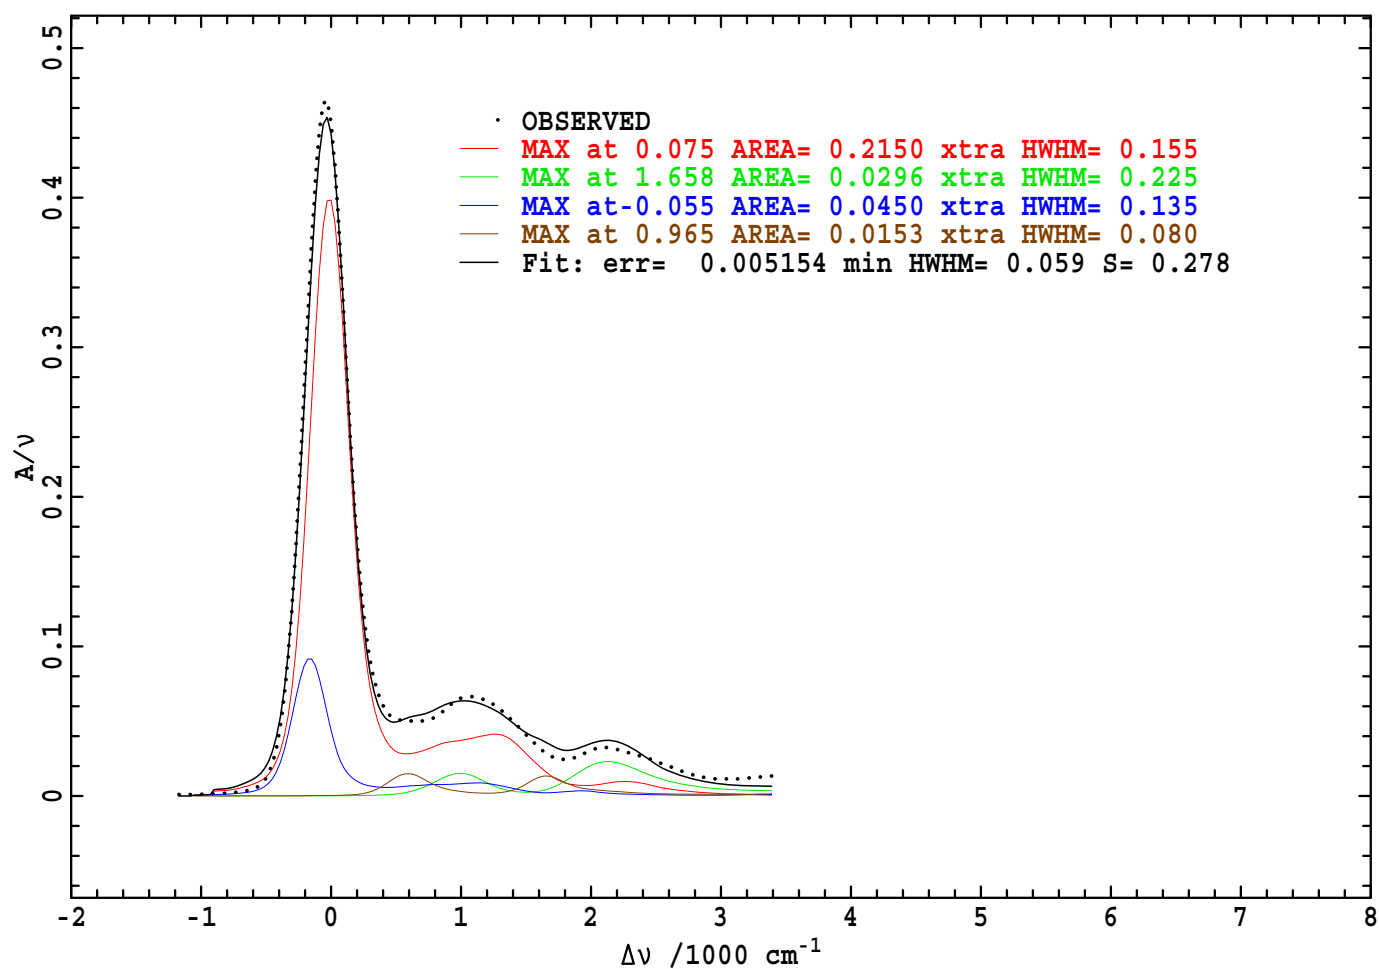

Fig. 1g: Chl-a ether 155 K

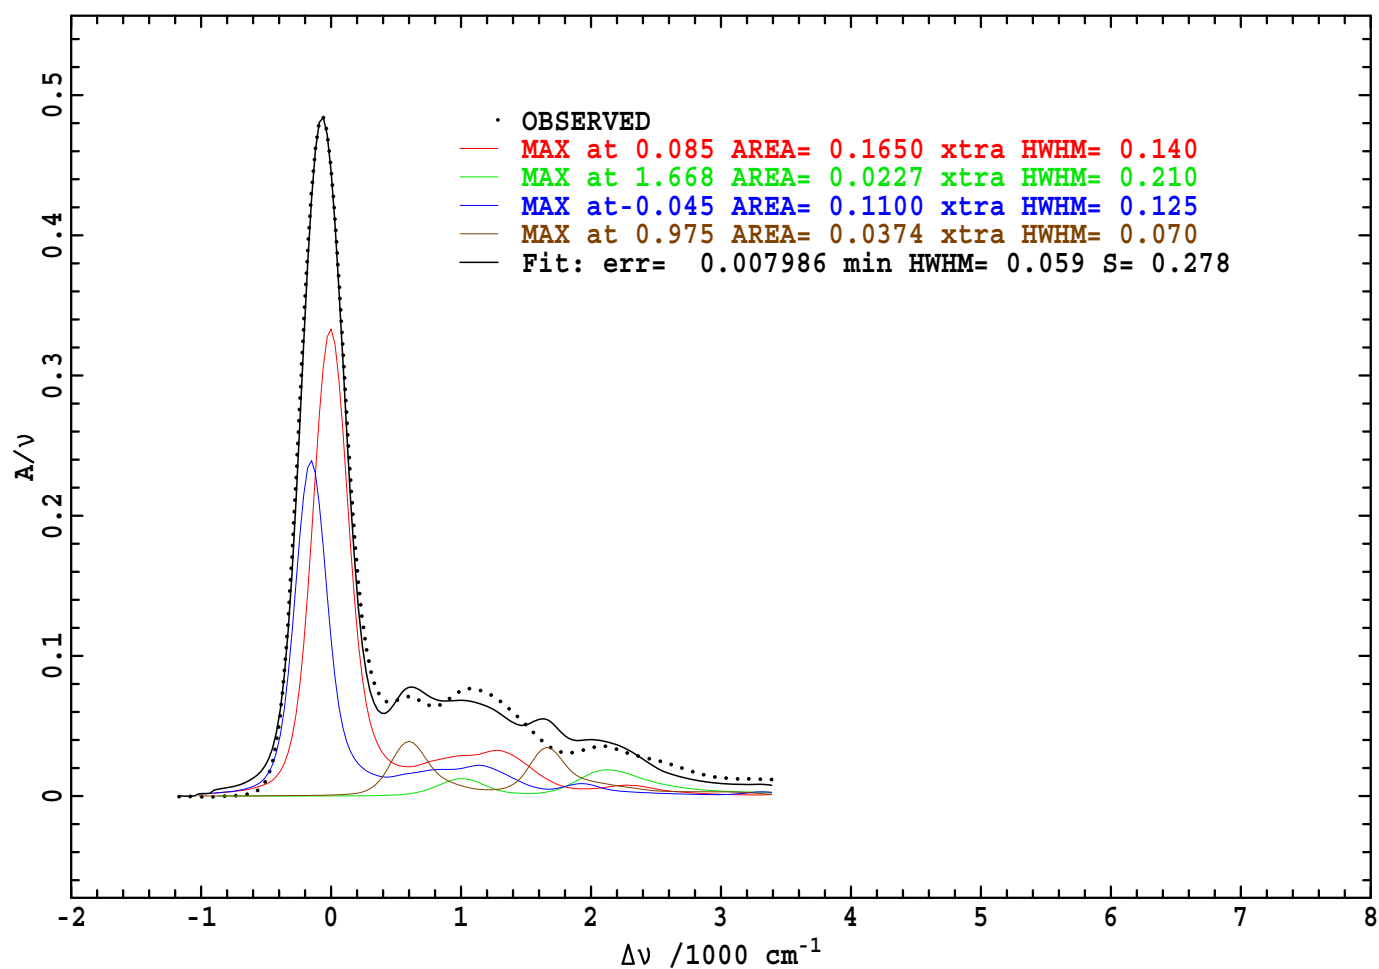



Fig. 1h: Chl-a ether 120 K

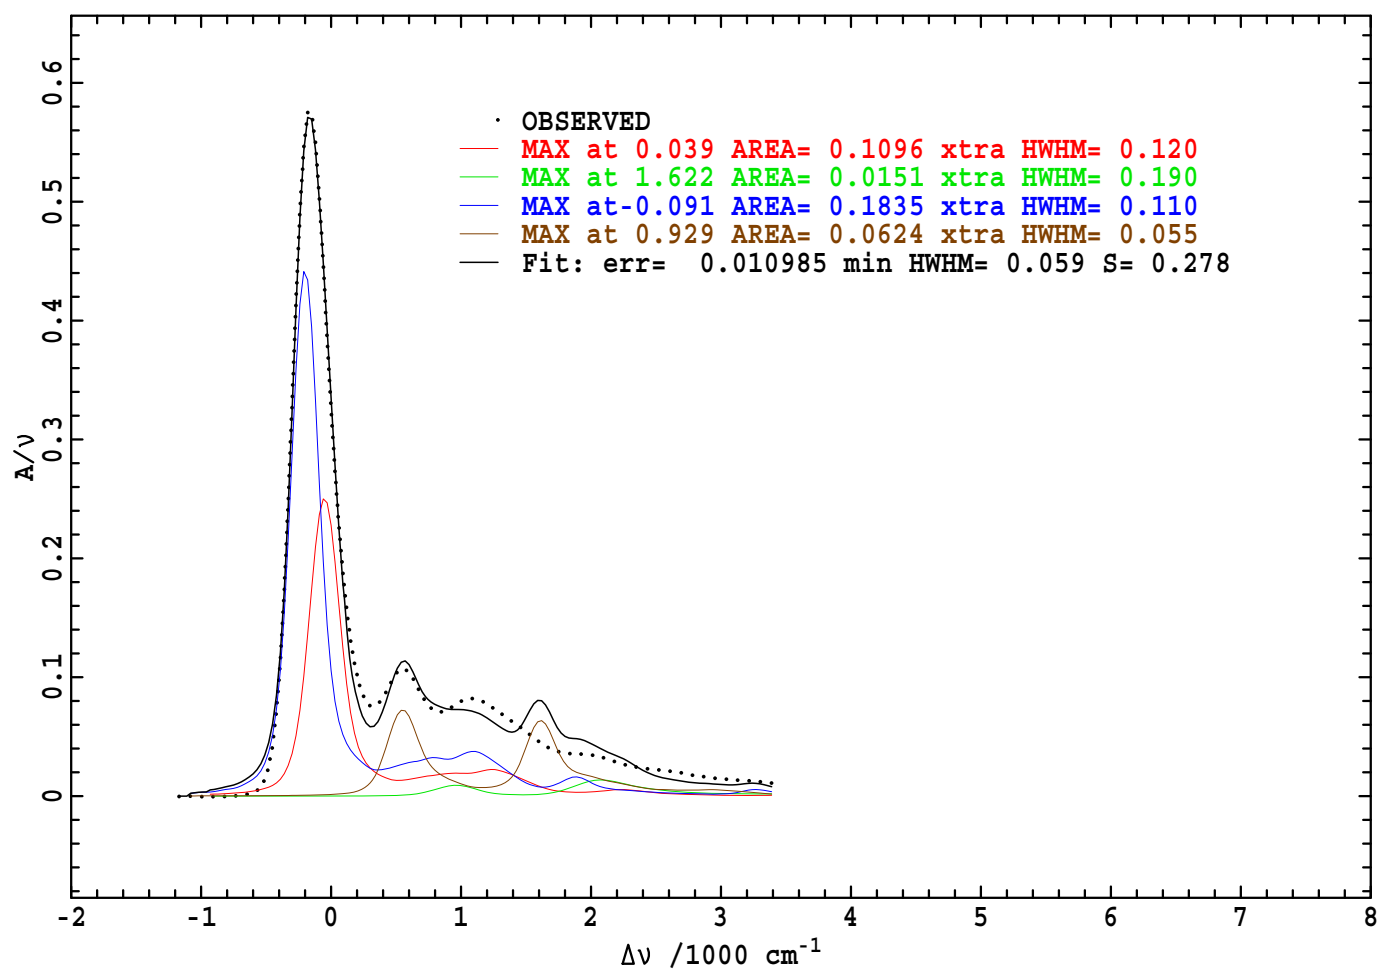

Fig. 11: CH<sub>2</sub>a dry ether 180 K

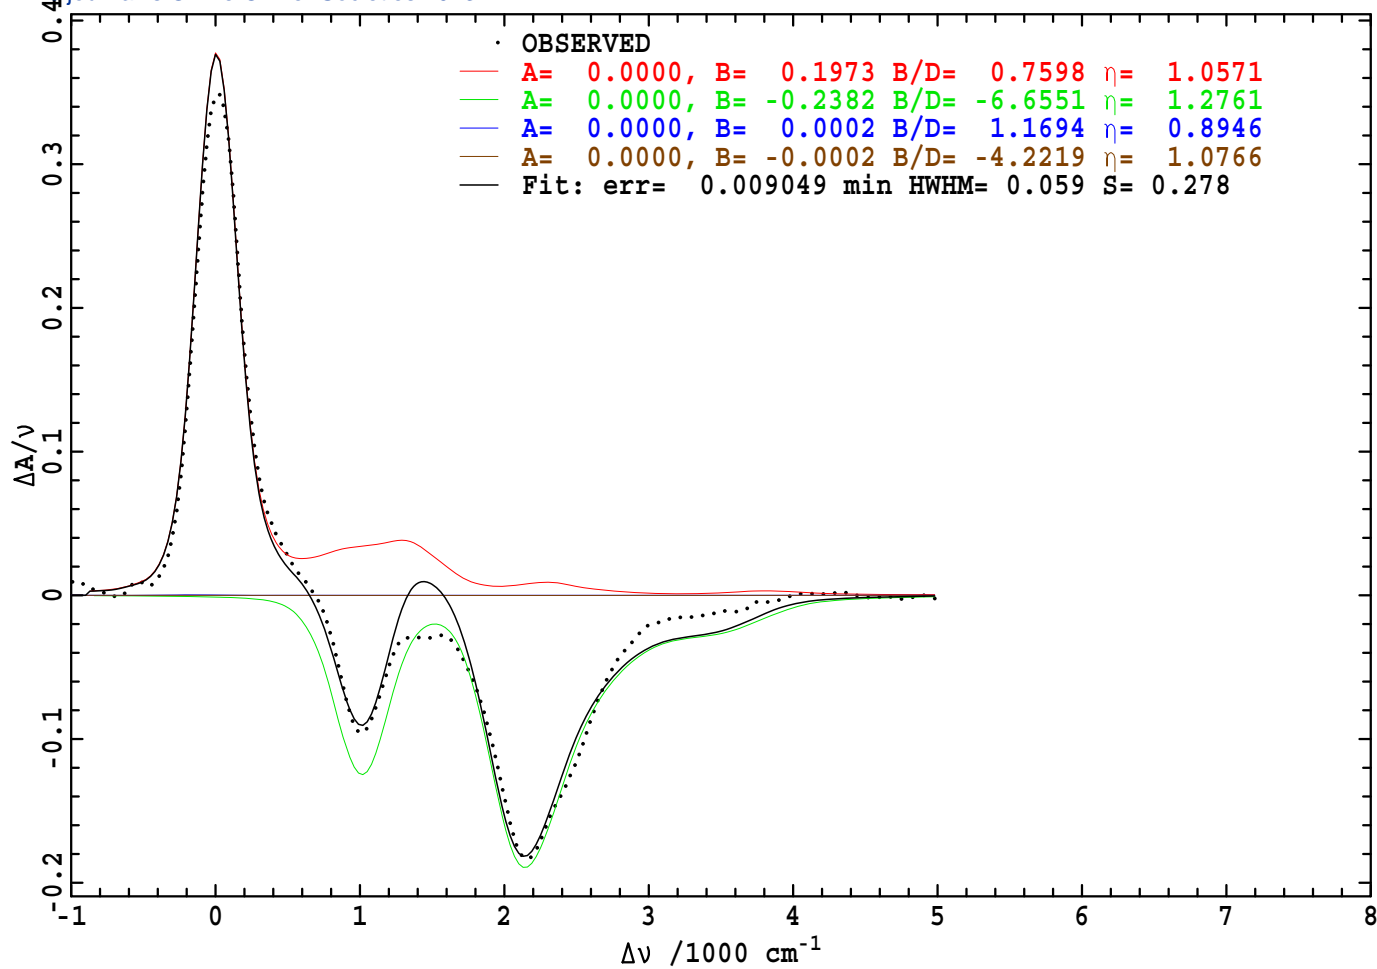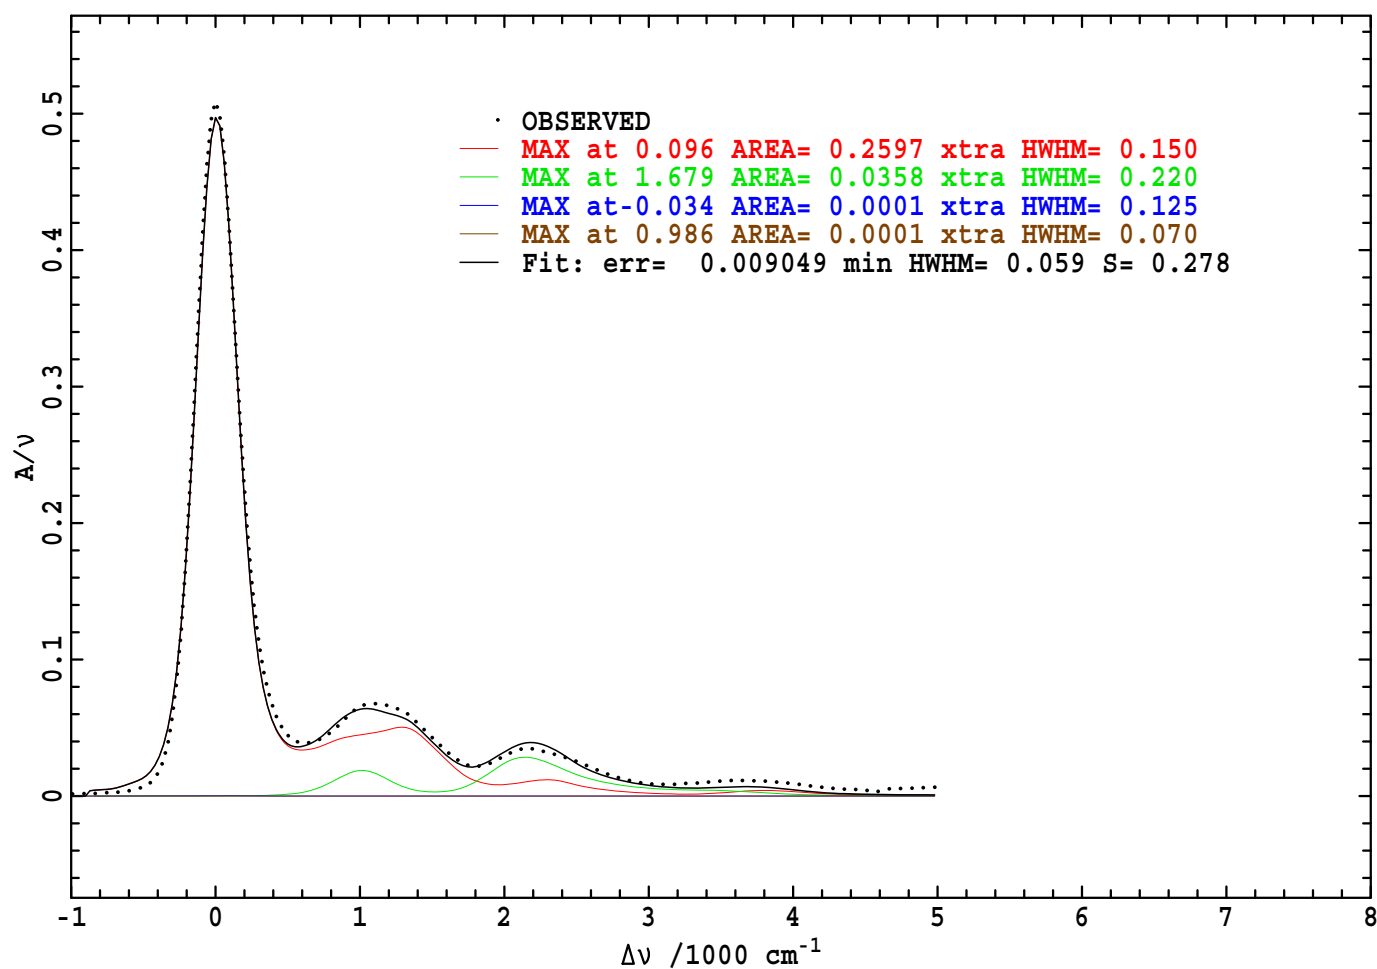

Fig. 1j: CHI-a dry ether 160 K

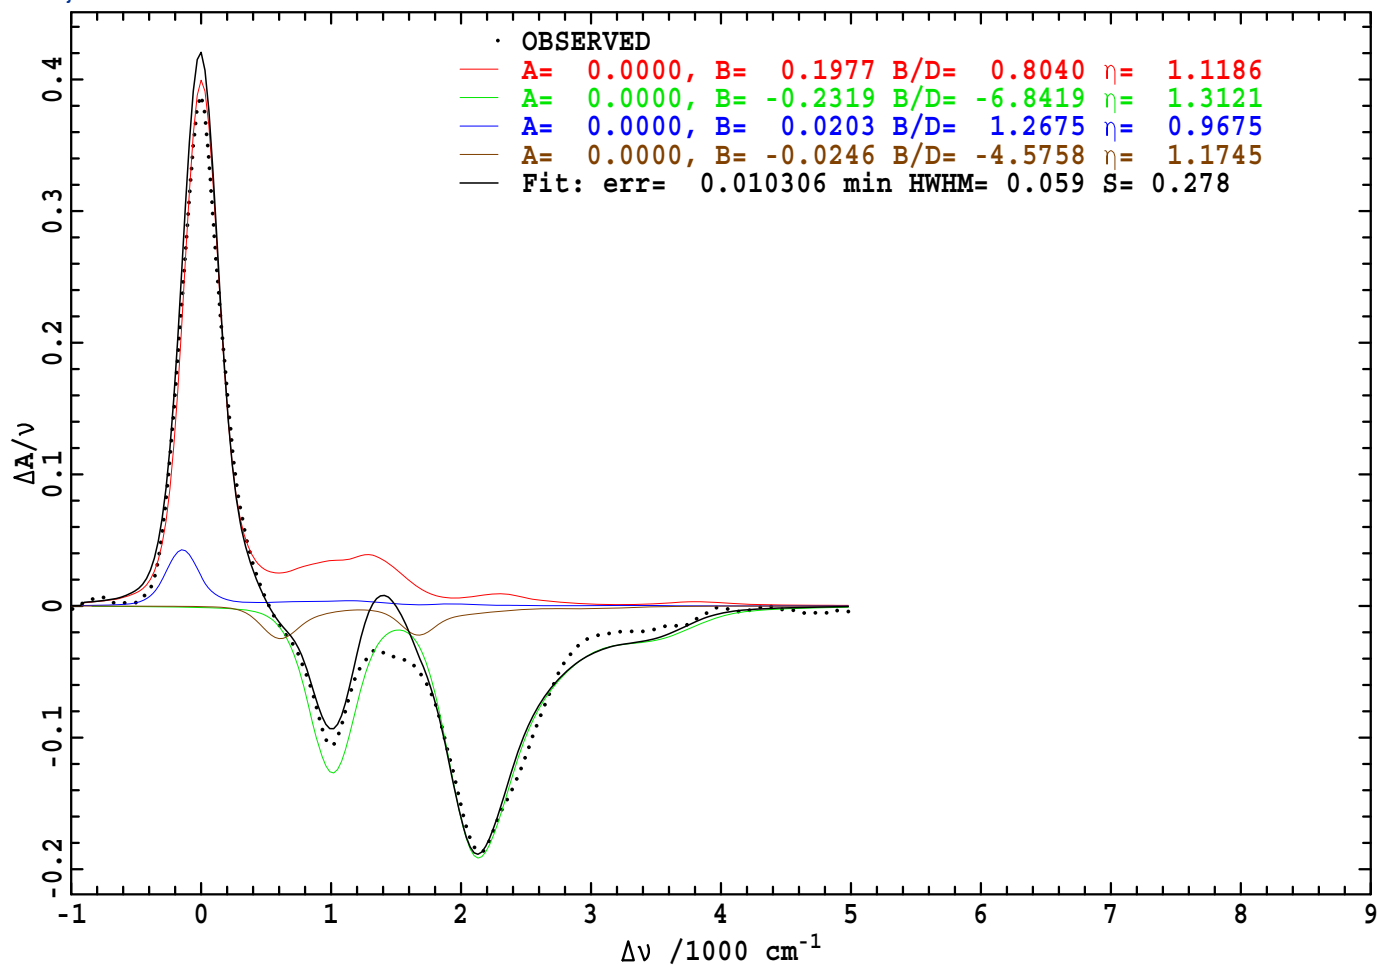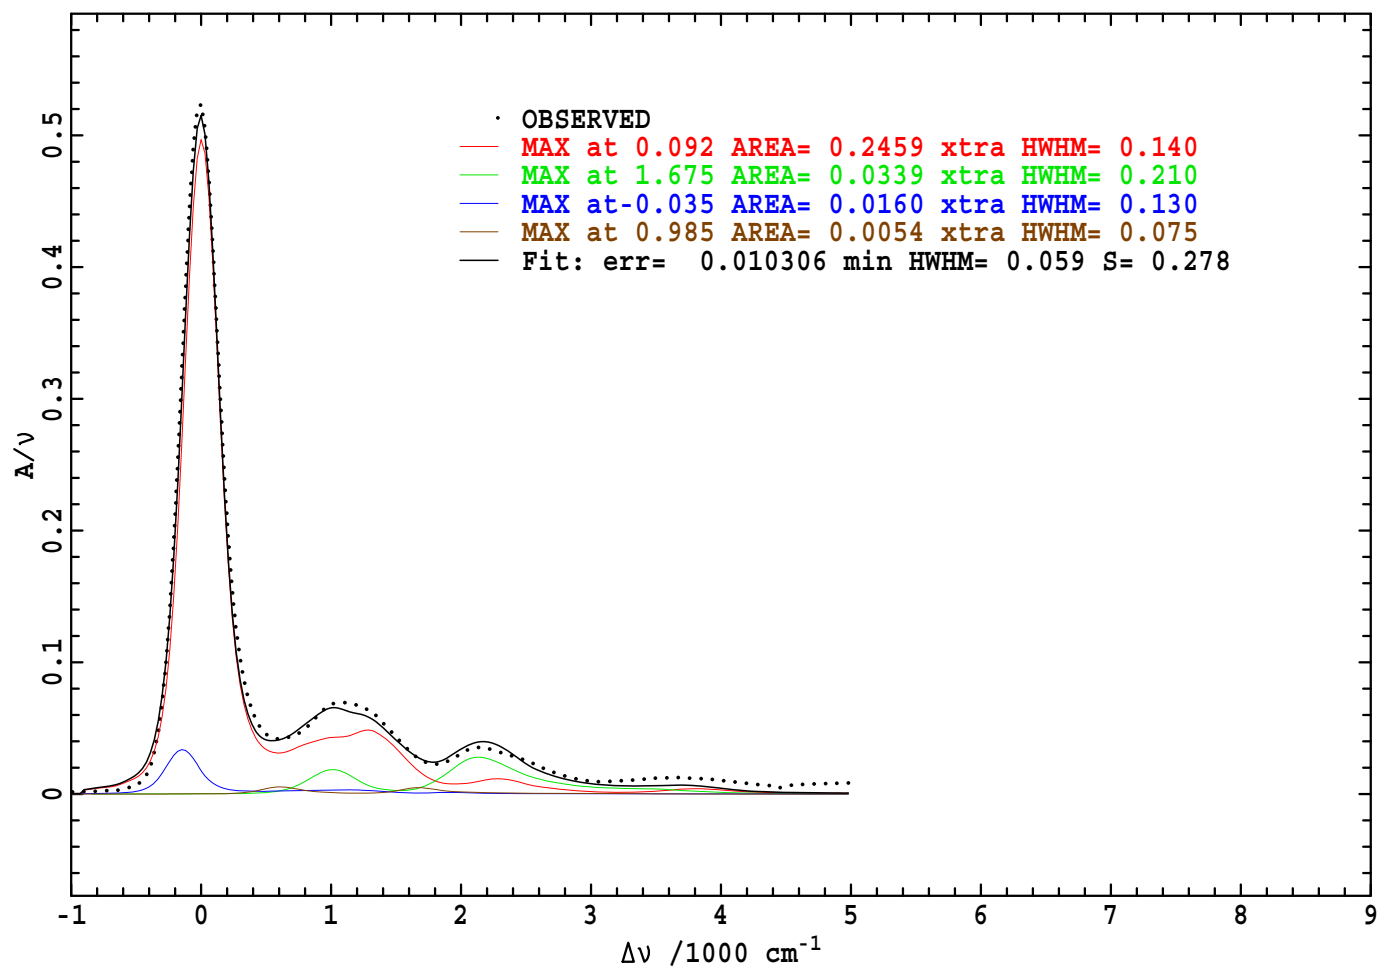

Fig. 1k: CH<sub>2</sub>a dry ether 150 K

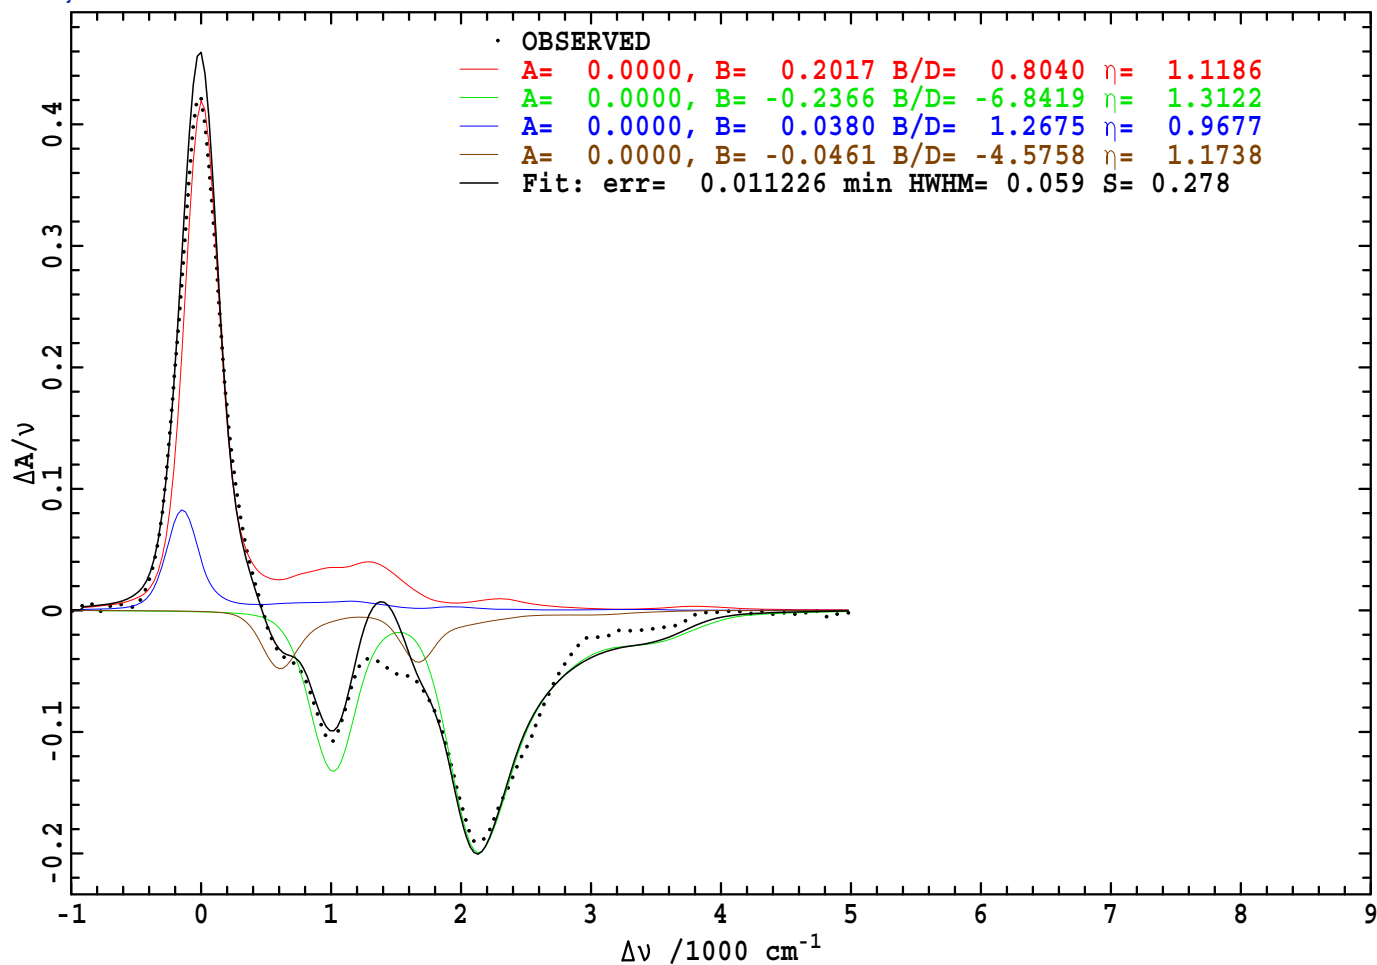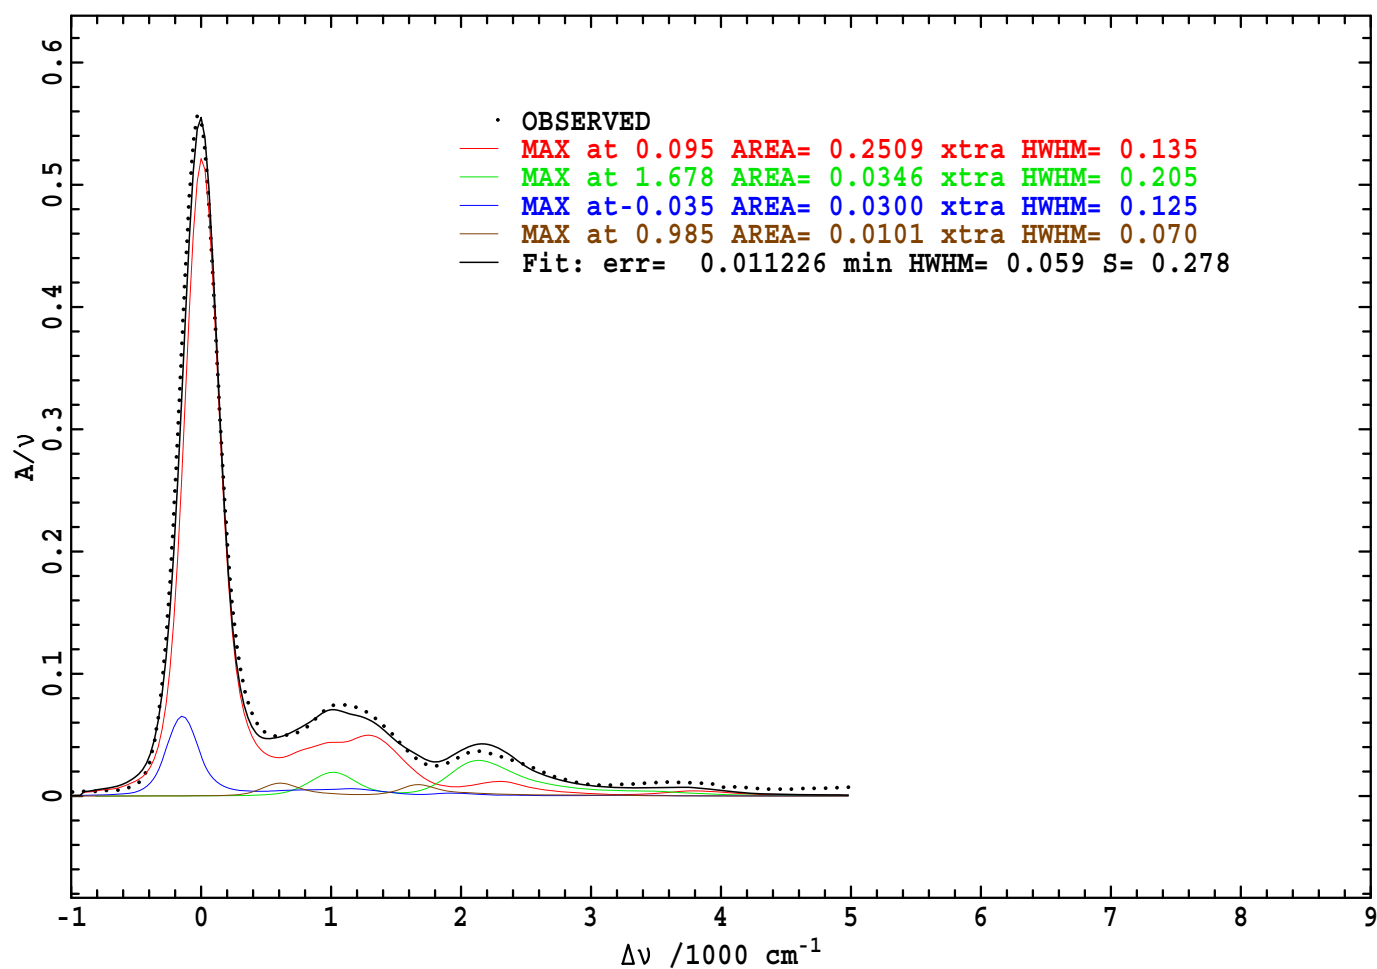

Supplement: c3cp53729c.pdf [file c3cp53729c.pdf]
